# Supplementary material
Source: PubMed Central journal article supplement (PMC5538734)
Supplement: NIHMS880813-supplement-supplement_1.pdf [file NIHMS880813-supplement-supplement_1.pdf]

## SUPPLEMENTARY MATERIAL

eTable 1: International Classification of Diseases, 9th Revision, Clinical Modification (ICD9-CM) codes used to determine mental health diagnoses included as covariates

eTable 2: Hazard ratios of all predictors included in adjusted models for full analytic sample and specialty clinic sub-sample

eTable 1: International Classification of Diseases, 9th Revision, Clinical Modification (ICD9-CM) codes used to determine mental health conditions included as covariates

| <b>Mental Health Condition</b> | <b>ICD9-CM Codes</b>                                                                                                     |
|--------------------------------|--------------------------------------------------------------------------------------------------------------------------|
| Depression                     | 296.2x, 296.3x, 300.4, 301.13, 309.0, 309.1, or 311                                                                      |
| Alcohol use disorder           | 291.x, 303.x, 305.0, 305.00, 305.01, 305.02, or 305.03                                                                   |
| Drug use disorder              | 292, 292.0, 292.1, 292.11, 292.12, 292.2, 304, 304.xx, 305.2x, 305.3x, 305.4x, 305.5x, 305.6x, 305.7x, 305.8x, or 305.9x |
| Post-traumatic stress disorder | 309.81                                                                                                                   |

eTable 2. Hazard ratios of all predictors included in adjusted models for full analytic sample and specialty clinic sub-sample

| Predictor                         | Full Analytic Sample |         | Specialty Clinic Sub-Sample |         |
|-----------------------------------|----------------------|---------|-----------------------------|---------|
|                                   | HR (95% CI)          | P value | HR (95% CI)                 | P value |
| Black race                        | 1.07 (0.92-1.23)     | 0.381   | 0.87 (0.76-1.00)            | 0.056   |
| Hispanic ethnicity                | 1.14 (0.89-1.46)     | 0.285   | 0.88 (0.69-1.12)            | 0.299   |
| OA year 2002                      | 1.04 (0.97-1.11)     | 0.294   | 1.09 (1.01-1.16)            | 0.018   |
| OA year 2003                      | 1.04 (0.96-1.11)     | 0.329   | 1.12 (1.05-1.21)            | 0.001   |
| OA year 2004                      | 1.13 (1.04-1.21)     | 0.002   | 1.25 (1.16-1.35)            | <.0001  |
| OA year 2005                      | 1.19 (1.09-1.29)     | <.0001  | 1.34 (1.23-1.45)            | <.0001  |
| OA year 2006                      | 1.30 (1.20-1.42)     | <.0001  | 1.46 (1.34-1.59)            | <.0001  |
| OA year 2007                      | 1.44 (1.32-1.58)     | <.0001  | 1.61 (1.47-1.76)            | <.0001  |
| OA year 2008                      | 1.68 (1.54-1.84)     | <.0001  | 1.88 (1.72-2.07)            | <.0001  |
| OA year 2009                      | 1.77 (1.61-1.93)     | <.0001  | 2.09 (1.91-2.29)            | <.0001  |
| OA year 2010                      | 1.68 (1.52-1.86)     | <.0001  | 2.09 (1.89-2.31)            | <.0001  |
| OA year 2011                      | 1.85 (1.66-2.07)     | <.0001  | 2.44 (2.18-2.73)            | <.0001  |
| Black race X OA year 2002         | 0.76 (0.61-0.96)     | 0.019   | 0.76 (0.60-0.95)            | 0.017   |
| Black race X OA year 2003         | 0.84 (0.67-1.05)     | 0.123   | 0.84 (0.67-1.06)            | 0.143   |
| Black race X OA year 2004         | 0.76 (0.60-0.96)     | 0.024   | 0.78 (0.61-0.99)            | 0.039   |
| Black race X OA year 2005         | 0.81 (0.63-1.03)     | 0.088   | 0.84 (0.65-1.07)            | 0.161   |
| Black race X OA year 2006         | 0.71 (0.55-0.92)     | 0.009   | 0.74 (0.57-0.96)            | 0.023   |
| Black race X OA year 2007         | 0.65 (0.49-0.85)     | 0.002   | 0.76 (0.58-1.00)            | 0.048   |
| Black race X OA year 2008         | 0.62 (0.47-0.81)     | 0.001   | 0.73 (0.56-0.96)            | 0.025   |
| Black race X OA year 2009         | 0.64 (0.49-0.84)     | 0.001   | 0.72 (0.55-0.95)            | 0.018   |
| Black race X OA year 2010         | 0.59 (0.43-0.79)     | <.0001  | 0.69 (0.51-0.93)            | 0.015   |
| Black race X OA year 2011         | 0.55 (0.39-0.77)     | 0.001   | 0.63 (0.44-0.89)            | 0.008   |
| Hispanic ethnicity X OA year 2002 | 1.01 (0.70-1.45)     | 0.963   | 1.03 (0.72-1.48)            | 0.859   |

|                                   |                  |        |                  |        |
|-----------------------------------|------------------|--------|------------------|--------|
| Hispanic ethnicity X OA year 2003 | 1.18 (0.83-1.68) | 0.355  | 1.21 (0.85-1.72) | 0.289  |
| Hispanic ethnicity X OA year 2004 | 0.98 (0.68-1.41) | 0.916  | 1.01 (0.70-1.45) | 0.972  |
| Hispanic ethnicity X OA year 2005 | 1.01 (0.69-1.49) | 0.954  | 1.14 (0.77-1.68) | 0.518  |
| Hispanic ethnicity X OA year 2006 | 1.15 (0.78-1.71) | 0.475  | 1.32 (0.89-1.96) | 0.164  |
| Hispanic ethnicity X OA year 2007 | 1.01 (0.67-1.52) | 0.955  | 1.18 (0.78-1.77) | 0.432  |
| Hispanic ethnicity X OA year 2008 | 1.00 (0.67-1.50) | 0.999  | 1.15 (0.76-1.72) | 0.511  |
| Hispanic ethnicity X OA year 2009 | 1.05 (0.70-1.57) | 0.819  | 1.16 (0.78-1.74) | 0.458  |
| Hispanic ethnicity X OA year 2010 | 0.86 (0.54-1.36) | 0.517  | 1.00 (0.63-1.58) | 0.993  |
| Hispanic ethnicity X OA year 2011 | 0.65 (0.38-1.11) | 0.117  | 0.70 (0.40-1.23) | 0.216  |
| Age 50-54                         | 1 [Reference]    |        | 1 [Reference]    |        |
| Age 55-59                         | 1.13 (1.07-1.20) | <.0001 | 1.21 (1.15-1.29) | <.0001 |
| Age 60-64                         | 1.02 (0.96-1.09) | 0.431  | 1.27 (1.20-1.35) | <.0001 |
| Age 65-69                         | 0.73 (0.68-0.78) | <.0001 | 1.25 (1.17-1.34) | <.0001 |
| Age 70-74                         | 0.56 (0.52-0.60) | <.0001 | 1.17 (1.09-1.26) | <.0001 |
| Age $\geq$ 75                     | 0.36 (0.34-0.39) | <.0001 | 0.90 (0.84-0.97) | 0.007  |
| Female                            | 0.99 (0.89-1.11) | 0.923  | 0.89 (0.80-1.00) | 0.050  |
| CCI=0                             | 1 [Reference]    |        | 1 [Reference]    |        |
| CCI=1-2                           | 0.73 (0.70-0.76) | <.0001 | 0.76 (0.73-0.79) | <.0001 |
| CCI $\geq$ 3                      | 0.61 (0.56-0.67) | <.0001 | 0.60 (0.55-0.66) | <.0001 |
| Depression                        | 0.95 (0.85-1.05) | 0.319  | 0.86 (0.78-0.96) | 0.006  |
| PTSD                              | 0.84 (0.78-0.90) | <.0001 | 0.78 (0.72-0.84) | <.0001 |
| Alcohol use disorder              | 0.95 (0.87-1.04) | 0.285  | 0.93 (0.85-1.02) | 0.140  |
| Drug use disorder                 | 0.98 (0.84-1.14) | 0.787  | 1.01 (0.86-1.17) | 0.935  |
| BMI<18.5                          | 0.34 (0.17-0.66) | 0.002  | 0.45 (0.23-0.88) | 0.020  |
| BMI 18.5-24.9                     | 1 [Reference]    |        | 1 [Reference]    |        |
| BMI 25.0-29.9                     | 1.61 (1.50-1.72) | <.0001 | 1.44 (1.34-1.56) | <.0001 |
| BMI $\geq$ 30.0                   | 2.47 (2.31-2.64) | <.0001 | 2.04 (1.89-2.19) | <.0001 |
| No pain                           | 1 [Reference]    |        | 1 [Reference]    |        |

|               |                  |        |                  |        |
|---------------|------------------|--------|------------------|--------|
| Mild pain     | 1.62 (1.52-1.73) | <.0001 | 1.19 (1.13-1.26) | <.0001 |
| Moderate pain | 2.09 (1.98-2.21) | <.0001 | 1.33 (1.26-1.39) | <.0001 |
| Severe pain   | 2.77 (2.62-2.92) | <.0001 | 1.56 (1.48-1.65) | <.0001 |

BMI=body mass index; CCI=Charlson Comorbidity Index; OA=osteoarthritis; PTSD=post-traumatic stress disorder; TKA=total knee arthroplasty

\*Restricted to those who also consulted with a rheumatologist or orthopedic surgeon within the study timeframe.
